# Supplementary material for: NaYF4:Yb/Er@PPy core–shell nanoplates: an imaging-guided multimodal platform for photothermal therapy of cancers
Source: Royal Society of Chemistry journal article supplement (doi:10.1039/c5nr06394a), 2015-12-14
Supplement: c5nr06394a1.pdf [file c5nr06394a1.pdf]

## Electronic Supplementary Information

### **NaYF<sub>4</sub>:Yb/Er@PPy Core-Shell Nanoplates: An Imaging-Guided Multimodal Platform for Photothermal Therapy of Cancers**

**Xiaojuan Huang<sup>a†</sup>, Bo Li<sup>a†</sup>, Chen Peng<sup>b†</sup>, Guosheng Song<sup>a</sup>, Yuxuan Peng<sup>a</sup>, Zhiyin Xiao<sup>a</sup>, Xijian Liu<sup>a</sup>, Jianmao Yang<sup>c</sup>, Li Yu<sup>d</sup>, Junqing Hu<sup>a\*</sup>**

<sup>a</sup> State Key Laboratory for Modification of Chemical Fibers and Polymer Materials, College of Materials Science and Engineering, Donghua University, Shanghai 201620, China.

<sup>b</sup> Department of Radiology, Shanghai Tenth People's Hospital, Tongji University, Shanghai 200072, China.

<sup>c</sup> Research Center for Analysis and Measurement, Donghua University, Shanghai 201620, China.

<sup>d</sup> Ian Wark Research Institute, University of South Australia, Mawson Lakes 5095, Australia.

\* Corresponding Author.

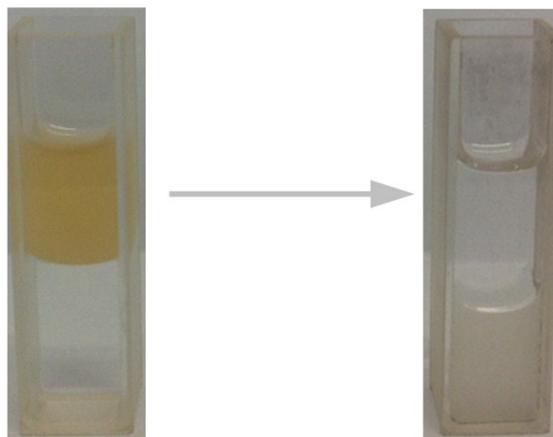

**Figure S1.** The left side is a photo showing the oil acid- $\text{NaYF}_4\text{:Yb/Er}$  nanoplates dispersed in cyclohexane/water, and the right side is the PVA- $\text{NaYF}_4\text{:Yb/Er}$  nanoplates dispersed in cyclohexane/water.

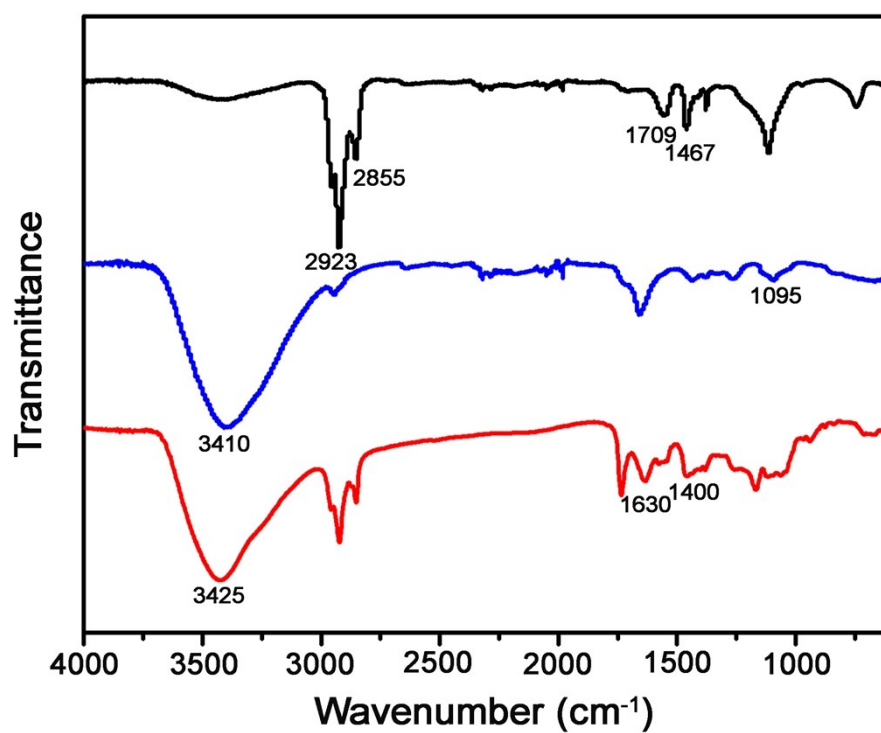

**Figure S2.** FTIR spectra of oil acid-NaYF<sub>4</sub>:Yb/Er (black line), PVA-NaYF<sub>4</sub>:Yb/Er (blue line), and NaYF<sub>4</sub>:Yb/Er@PPy nanoplates (red line).

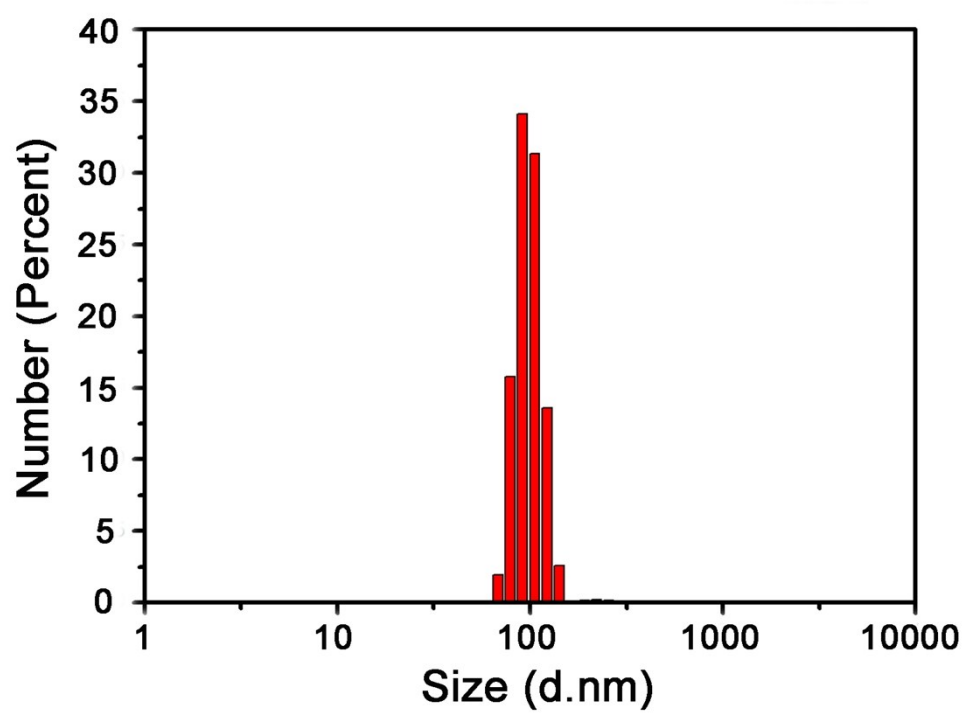

**Figure S3.** Dynamic light scattering (DLS) diameter distribution of the NaYF<sub>4</sub>:Yb/Er@PPy nanoplates.

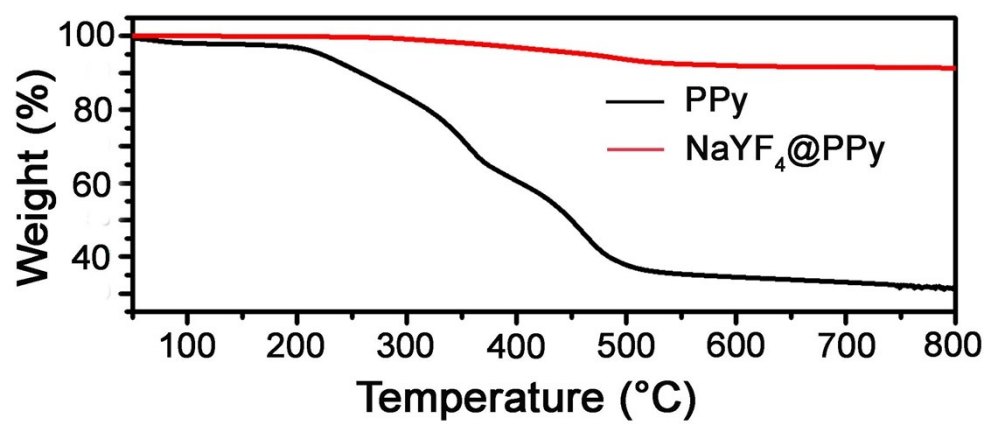

**Figure S4.** TGA curve of PPy and the disc-shaped NaYF<sub>4</sub>:Yb/Er@PPy nanoplates.

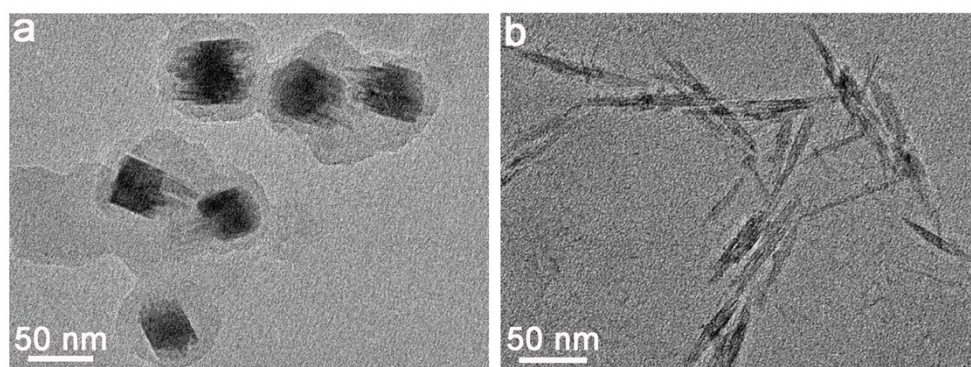

**Figure S5.** TEM images of nanocomposites with more  $\text{Fe}^{3+}$  (5 mL) added: a)  $3.31 \text{ mg L}^{-1}$ , b)  $6.61 \text{ mg L}^{-1}$ .

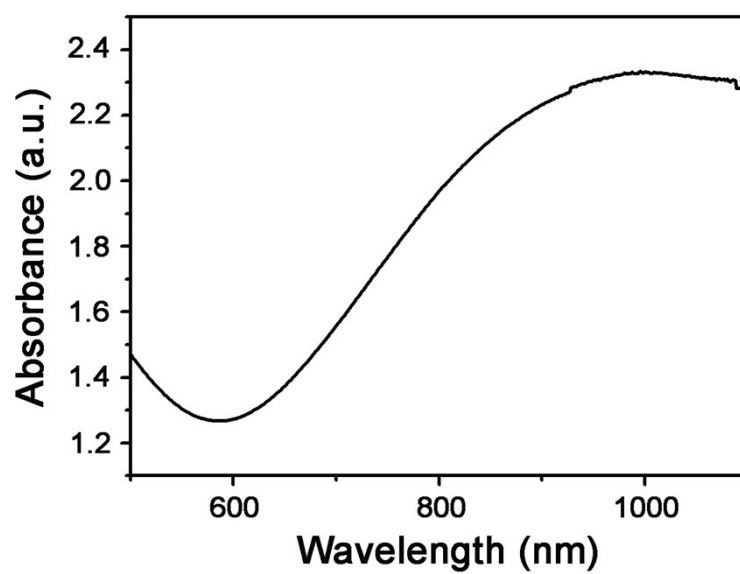

**Figure S6.** UV-vis absorbance spectrum for the aqueous dispersion of the PPy.

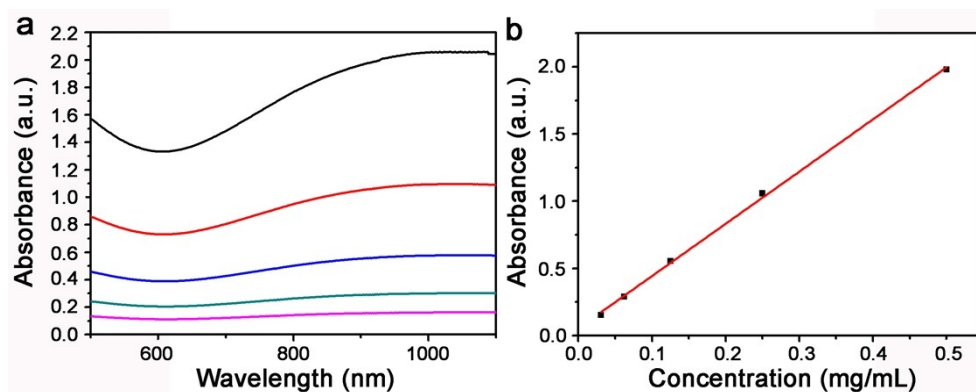

**Figure S7.** (a) UV-Vis-NIR absorption spectra of NaYF<sub>4</sub>:Yb/Er@PPy nanoplates with different concentrations (from top to bottom are 0.5, 0.25, 0.125, 0.063, 0.031 mg/mL). (b) Corresponding linear relationship of the absorbance at 915 nm versus concentrations.



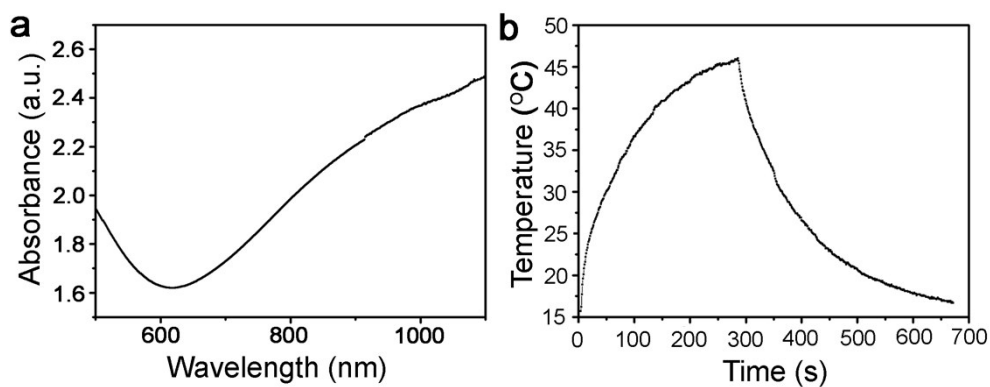

**Figure S8.** a) UV-vis absorbance spectrum for the aqueous dispersion of hexagonal NaYF<sub>4</sub>:Yb/Er@PPy nanoplates. b) Temperature elevation of the dispersion of the hexagonal NaYF<sub>4</sub>:Yb/Er@PPy nanoplates, under an exposure of NIR light (915 nm, 0.5 W cm<sup>-2</sup>) for 5 min, and then the laser was shut off.

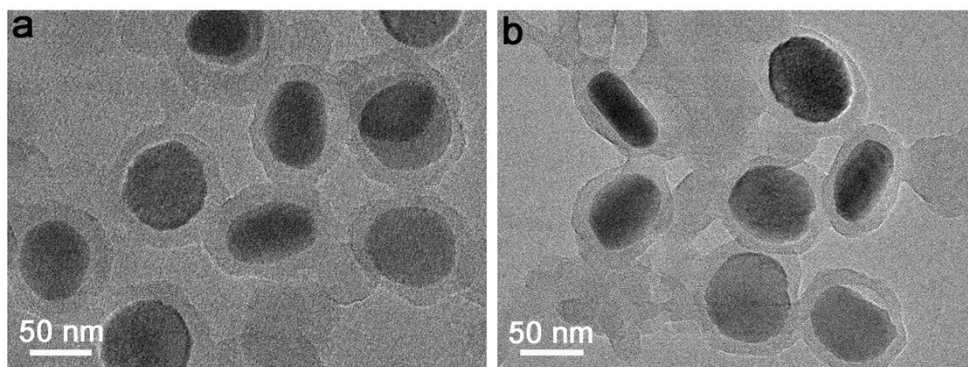

**Figure S9.** TEM images of the disc-shaped NaYF<sub>4</sub>:Yb/Er@PPy nanoplates a) before and b) after the laser (915 nm, 0.5 W cm<sup>-2</sup>) irradiation for 25 min.

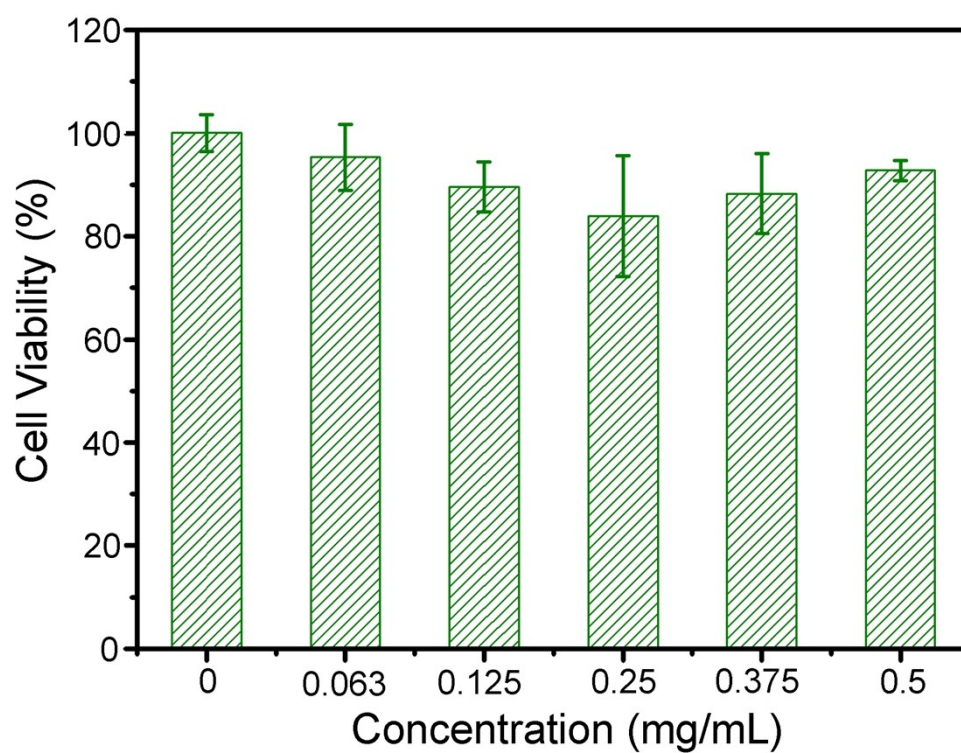

**Figure S10.** In vitro cell viabilities of HeLa Cells incubated with the aqueous dispersion of the NaYF<sub>4</sub>:Yb/Er@PPy nanoplates with different concentrations for 24 h.

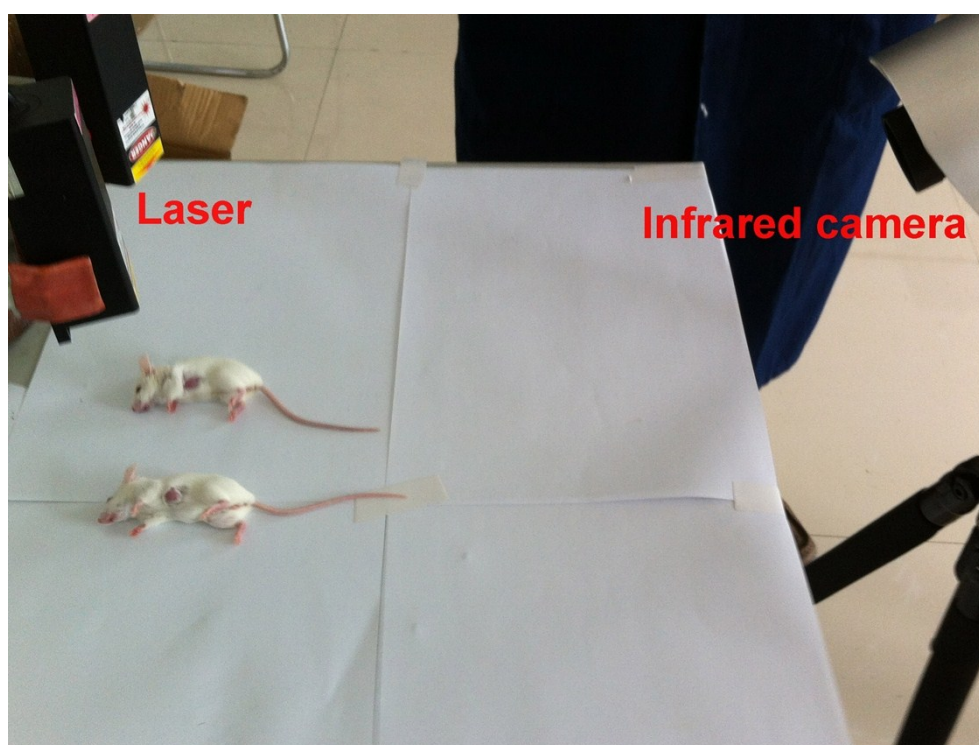

**Figure S11.** A photograph showing the typical experimental setup for in vivo infrared thermal imaging and photothermal ablation.

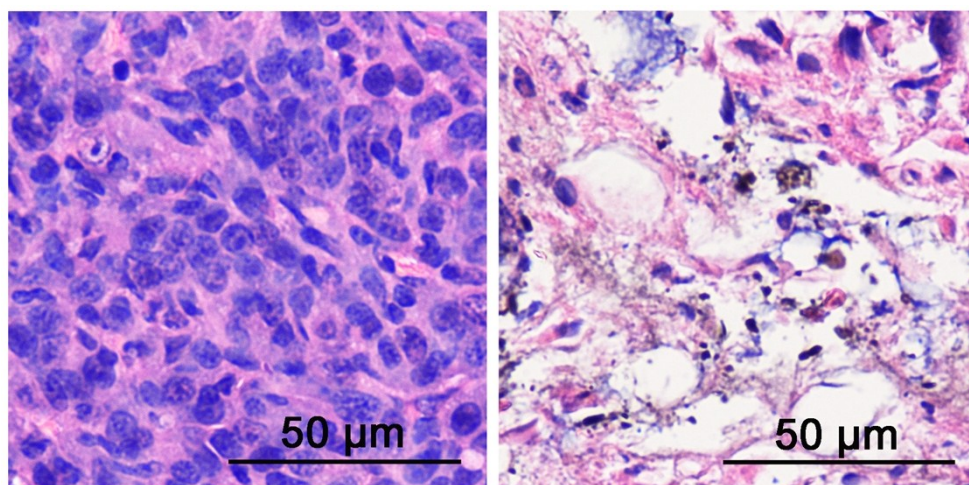

**Figure S12.** The representative hematoxylin and eosin stained histological images of ex vivo tumor sections treated by the irradiation of 915 nm laser ( $0.5 \text{ W/cm}^2$ ) over a period of 10 min injected with: PBS (left) and the aqueous dispersion of  $\text{NaYF}_4\text{:Yb/Er@PPy}$  nanoplates (right).
